# Supplementary material for: A bony-crested Jurassic dinosaur with evidence of iridescent plumage highlights complexity in early paravian evolution
Source: PubMed Central journal article supplement (PMC5768872; doi:10.1038/s41467-017-02515-y), 2018-01-15
Supplement: 41467_2017_2515_MOESM3_ESM.pdf [file 41467_2017_2515_MOESM3_ESM.pdf]

**File Name:** Supplementary Data 1

**Description:** Matrix derived from Xu et al 2015 (1) for phylogenetic analysis, which is saved in Nona format.

**File Name:** Supplementary Data 2

**Description:** Matrix derived from Brusatte et al 2014 (2) for phylogenetic analysis, which is saved in Nona format.

1. X. Xu *et al.*, A bizarre Jurassic maniraptoran theropod with preserved evidence of membranous wings. *Nature* **521**, 70-73 (2015).
2. S. Brusatte, G. Lloyd, S. Wang, M. Norell, Gradual assembly of avian body plan culminated in rapid rates of evolution across the dinosaur-bird transition. *Current Biology* **24**, 2386-2392 (2014).
